# Supplementary material
Source: publisher figshare collection journal article supplement (https://frontiersin.figshare.com/ndownloader/files/20021855)
Supplement: Supplementary file [file 20021855]

## Supplemental Figure #1: Background Curves

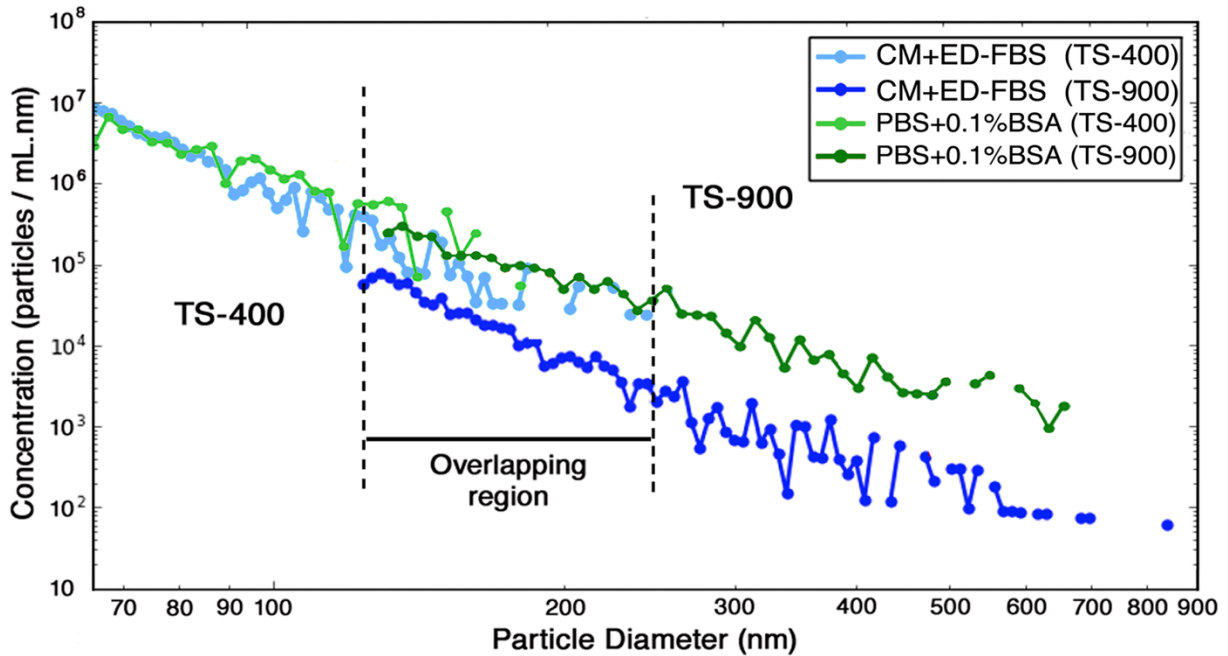

Computer-generated CSD vs. particle size for culture media+exosome-depleted FBS (CM+ED-FBS) and PBS+0.1% BSA in the whole size range. The values for each point of CM+ED-FBS plus those corresponding to PBS+0.1% BSA were considered “Background” and subtracted from the measured values for HEI-OC1 EVs.
